# Supplementary material
Source: PubMed Central journal article supplement (PMC8589717)
Supplement: mmc1.pdf [file mmc1.pdf]

## Supplementary material

### Methods

#### *Patients*

Patients with newly diagnosed or relapsing GPA/MPA/EGPA as classified by the Chapel Hill Consensus Conference (CHCC) classification<sup>11</sup> during the COVID-19 pandemic period of January-July 2020 were included in the study. Patients were enrolled from 12 different centers from the US, UK, and Europe (Johns Hopkins (n=15), University of North Carolina (n=12), Washington University, St. Louis (n=7) Northwell Health (n=7), Ohio State University, Wexner Medical Center (n=3), Tallaght hospital and Beaumont hospital, Ireland (n=12), Imperial College, London (n=21), Lancashire Teaching hospitals (n=36), Manchester University Foundation trust (n=26), LMU university, Munich (n=14), Medical University Innsbruck, Austria (n=10) and Charles University, Prague (n=28). The study was approved by the institutional review board at each center.

#### *Data collection*

Data regarding demographics, disease type, ANCA type, organ involvement by AAV, new or relapsing disease, co-morbidities, e-GFR at presentation, dialysis requirement at entry, remission at 6 months and at last follow up were collected. Details of induction therapy including the type and dose of immunosuppressive medications, use of plasma exchange and use of PJP prophylaxis were collected. We collected data on bone marrow suppression, infections requiring hospitalization, COVID-19 infection, ESKD and death at last follow up. Complete remission was defined as a Birmingham Vasculitis Activity Score (version 3)<sup>12</sup> of zero with patients either off prednisone or with prednisone doses less than 10 mg daily. ESKD was defined as need for renal replacement therapy. Bone marrow suppression was defined by the presence of leukopenia and thrombocytopenia.

#### *Outcomes and Follow-Up*

Our primary outcome was achievement of complete remission at 6 months. Secondary outcomes included eGFR at 6 months, change in eGFR over 6 months, death, bone marrow suppression, steroid dosing at 16 weeks and 6 months, infection requiring hospitalization, and ESRD. eGFR was calculated using the CKD-EPI creatinine equation.<sup>13</sup> Renal recovery is defined as becoming dialysis independent after presenting in ESKD during relapse or diagnosis. All patients were followed until death or date of last follow up.

#### *Statistical analyses*

Comparisons of categorical variables were performed using a chi-squared test. Comparisons of continuous variables were performed using Kruskal Wallis and ANOVA test. All statistical tests used a P value of 0.05 to determine statistical significance. Stata version 16.1 was used for all statistical analyses.

Table 3. Different clinical outcomes by different treatment regimens.

|                                                       |                                         | Rituximab alone    | Cyclophosphamide alone | Rituximab + Cyclophosphamide | p-value |
|-------------------------------------------------------|-----------------------------------------|--------------------|------------------------|------------------------------|---------|
|                                                       | Number of subjects                      | n=84               | n=49                   | n=49                         |         |
| Age at diagnosis                                      | Median (IQR) years                      | 66 (58-72.5); n=84 | 71 (62-77); n=49       | 62 (53-69); n=49             | 0.007   |
| Sex, n (%)                                            | Female                                  | 40 (48); n=84      | 27 (55); n=49          | 26 (53); n=49                | 0.671   |
| ANCA type, n (%)                                      | GPA                                     | 46 (55); n=84      | 20 (42); n=48          | 19 (39); n=49                | 0.324   |
|                                                       | MPA                                     | 36 (43); n=84      | 25 (52); n=48          | 28 (57); n=49                |         |
|                                                       | EGPA                                    | 2 (2); n=84        | 3 (6); n=48            | 2 (4); n=49                  |         |
| Kidney involvement during relapse or diagnosis, n (%) |                                         | 67 (80); n=84      | 43 (88); n=49          | 40 (82); n=49                | 0.498   |
| GFR (ml/min/1.73 m <sup>2</sup> )                     | Mean (SD) at start of the study (n=180) | 34 (30); n=82      | 24 (24); n=49          | 40 (36); n=49                | 0.0351  |
|                                                       | 6 months mean (SD); n=154               | 43 (29); n=67      | 33 (24); n=44          | 47 (27); n=43                | 0.0659  |
|                                                       | Δ Over 6 months (median IQR); n=156     | +6 (0-15), n=67    | +6 (-1.8-16.2); n=45   | +6 (-5.5-15.7); n=44         | 0.68    |
| Remission at 6 months (n=170), n (%)                  |                                         | 73 (92); n=79      | 42 (91); n=46          | 39 (87); n=45                | 0.564   |
| Dialysis Independence (n=30), n (%)                   |                                         | 6 (60) n=10        | 8 (62); n=13           | 5 (71); n=7                  | 0.877   |
| ESKD by end of study n=177, n (%)                     |                                         | 8 (10); n=82       | 7 (14); n=49           | 2 (4); n=46                  | 0.259   |
| Death (n=182), n (%)                                  |                                         | 5 (6); n=84        | 6 (12); n=49           | 5 (10); n=49                 | 0.43    |
| Bone Marrow suppression (n=182), n (%)                |                                         | 2 (2); n=84        | 2 (4); n=49            | 6 (12); n=49                 | 0.048   |
| Infection requiring hospitalization (n=182), n (%)    |                                         | 10 (12); n=84      | 6 (12); n=49           | 13 (27); n=49                | 0.06    |

|                                                                                               |  |                              |                          |                          |                  |
|-----------------------------------------------------------------------------------------------|--|------------------------------|--------------------------|--------------------------|------------------|
| <b>Mean (SD)<br/>Cumulative steroid<br/>dose in mg (n=166)</b>                                |  | <b>2640 (1851);<br/>n=79</b> | <b>3428 (1567); n=45</b> | <b>3154 (2054); n=42</b> | <b>0.0585</b>    |
| <b>Mean (SD)<br/>Cumulative Dose of<br/>IV pulse<br/>methylprednisolone<br/>in mg (n=168)</b> |  | <b>916 (1145);<br/>n=75</b>  | <b>1047 (805); n=45</b>  | <b>979 (866); n=48</b>   | <b>0.7765</b>    |
| <b>Use of pulse steroids<br/>(n=182), n (%)</b>                                               |  | <b>42 (50); n=84</b>         | <b>39 (80); n=49</b>     | <b>36 (73); n=49</b>     | <b>&lt;0.001</b> |
| <b>Mean (SD) Daily<br/>Prednisone dose at<br/>16 weeks</b>                                    |  | <b>7.0 (5.5); n=76</b>       | <b>9.4 (4.3); n=45</b>   | <b>8.7 (8.0) n=45</b>    | <b>0.0644</b>    |
| <b>Mean (SD) Daily<br/>Prednisone dose at 6<br/>months</b>                                    |  | <b>4.1 (3.6); n=76</b>       | <b>7.1 (4.8); n=42</b>   | <b>4.9 (4.3); n=45</b>   | <b>0.0009</b>    |

Table 4. Treatment differences among patients tested positive and negative for COVID-19

| Treatment variables                                  |                    | Entire COVID-19 tested cohort | COVID-19 (-)           | COVID-19 (+)           | P-value |
|------------------------------------------------------|--------------------|-------------------------------|------------------------|------------------------|---------|
|                                                      | Number of subjects | n=115                         | n=99                   | n=16                   |         |
| Use of pulse steroids, n (%)                         |                    | 82 (71)                       | 70 (71)                | 12 (75)                | 0.725   |
| Cumulative Dose of IV pulse methylprednisolone in mg | Mean (SD)          | 1144 (1021); n=107            | 1172 (1039); n=91      | 984 (924); n=16        | 0.7275  |
|                                                      | Median (IQR)       | 1000 (250-1500); n=107        | 1000 (250-1500); n=91  | 750 (375-1250); n=16   | 0.7258  |
| Cumulative steroid dose (mg)                         | Mean (SD)          | 3111 (1857); n=103            | 3124 (1829); n=92      | 2999 (2175); n=11      | 0.8341  |
|                                                      | Median (IQR)       | 2830 (1680-4230); n=103       | 2951 (1691-4127); n=92 | 1952 (1500-4888); n=11 | 0.7977  |
| Rituximab use only, n (%)                            |                    | 43 (37); n=115                | 40 (40); n=99          | 3 (19); n=16           | 0.097   |
| Cyclophosphamide use only, n (%)                     |                    | 26 (23); n=115                | 22 (22); n=99          | 4 (25); n=16           | 0.805   |
| Rituximab and Cyclophosphamide, n (%)                |                    | 42 (37); n=115                | 34 (34); n=99          | 8 (50); n=16           | 0.228   |
| Cyclophosphamide cumulative dose                     | Mean (SD)          | 3.4 (2.5); n=56               | 3.4 (2.5); n=56        | 3.1 (1.9); n=12        | 0.7095  |
|                                                      | Median (IQR)       | 3 (1.6-4.5); n=56             | 3 (1.6-4.5); n=56      | 2.5 (1.7-4.8); n=12    | 0.8716  |
| PLEX, n (%)                                          |                    | 20 (17); n=115                | 18 (18); n=99          | 2 (13); n=16           | 0.578   |

Table 5. Outcomes of patients diagnosed with COVID-19

| Outcomes                  |  | Death        | Hospitalized for infectious cause | Median (IQR) interval from AAV to COVID-19 in days | ESKD at end of study, n (%) | Kidney recovery, n (%) | Δ Over 6 months (median IQR) |
|---------------------------|--|--------------|-----------------------------------|----------------------------------------------------|-----------------------------|------------------------|------------------------------|
| Total COVID patients n=16 |  | 4 (25); n=16 | 7 (44); n=15                      | 33 (4-168); n=15                                   | 0; n=15                     | 1 (100); n=1*          | 5.0 (-1.9-15.5); n=12        |

\* One other patient had a dialysis dependent AKI on entry, but they died before renal recovery data was observed.

Table 6. Patient outcomes of the US, UK, & European cohorts

| Treatment variables                        |                    | Entire cohort      | United States         | United Kingdom  | Europe             | P-value |
|--------------------------------------------|--------------------|--------------------|-----------------------|-----------------|--------------------|---------|
|                                            | Number of subjects | n=191              | n=44                  | n=83            | n=64               |         |
| Median (IQR) $\Delta$ eGFR Over 6 months   |                    | 6 (-2-15.4); n=162 | 12.5 (4.5-19.5); n=36 | 1.5 (-6-8) n=70 | 7 (0.20-16.9) n=56 | 0.0005  |
| Remission at 6 months, n (%)               |                    | 160 (90); n=178    | 37 (90); n=41         | 64 (85); n=75   | 59 (95); n=62      | 0.164   |
| Infection requiring hospitalization, n (%) |                    | 29 (15); n=191     | 9 (20); n=44          | 8 (10); n=83    | 13 (20); n=64      | 0.13    |
| Kidney Recovery, n (%)                     |                    | 19 (61); n=31      | 6 (60); n=10          | 4 (36); n=11    | 9 (90); n=10       | 0.042   |
| ESKD by end of study, n (%)                |                    | 19 (10); n=186     | 7 (17); n=41          | 10 (12); n=83   | 2 (3); n=62        | 0.058   |
| Bone Marrow suppression, n (%)             |                    | 10 (5); n=190      | 1 (2); n=43           | 7 (8); n=83     | 2 (3); n=64        | 0.233   |
| Death, n (%)                               |                    | 16 (8); n=191      | 3 (7); n=44           | 8 (10); n=83    | 5 (8); n=64        | 0.845   |

Table 7. Outcomes of patients with new and relapsing AAV

| Outcome variables                          | New Disease       | Relapsing Disease | P-value |
|--------------------------------------------|-------------------|-------------------|---------|
| Number of patients                         | n=132             | n=59              |         |
| Median (IQR) $\Delta$ eGFR Over 6 months   | 7 (0-16.9); n=108 | 0.59 (-6-9); n=54 | 0.0042  |
| Remission at 6 months, n (%)               | 108 (89); n=122   | 52 (93); n=56     | 0.373   |
| Kidney Recovery, n (%)                     | 19 (68); n=28     | 0; n=3            | 0.022   |
| ESRD by end of study, n (%)                | 14 (11); n=128    | 5 (9); n=58       | 0.629   |
| Death, n (%)                               | 12 (9); n=132     | 4 (7); n=59       | 0.594   |
| Bone Marrow suppression, n (%)             | 6 (5); n=131      | 4 (7); n=59       | 0.53    |
| Infection requiring hospitalization, n (%) | 21 (16); n=132    | 4 (7); n=59       | 0.909   |

Table 8. Treatment variables of patients with new and relapsing AAV

| Treatment variables                                             | New disease        | Relapse           | P-value |
|-----------------------------------------------------------------|--------------------|-------------------|---------|
|                                                                 | n=132              | n=59              |         |
| Use of pulse steroids, n (%)                                    | 95 (72); n=132     | 22 (37); n=59     | <0.001  |
| Mean (SD) cumulative dose of IV pulse Solumedrol in mg          | 1106 (1015); n=124 | 502 (744); n=51   | 0.0002  |
| Mean (SD) cumulative steroid dose for remission induction in mg | 3221 (1827); n=116 | 2414 (1762); n=55 | 0.007   |
| Mean (SD) steroid dose at 16 weeks in mg                        | 7.8 (5.8); n=118   | 9.2 (7.8); n=56   | 0.1902  |
| Mean (SD) steroid dose at 6 months in mg                        | 4.8 (4.3); n=116   | 5.8 (4.7); n=55   | 0.1733  |
| Proportion off steroids at 6 months, n (%)                      | 34 (28); n=122     | 12 (21); n=56     | 0.362   |
| Rituximab use only, n (%)                                       | 49 (37); n=132     | 35 (59); n=59     | 0.004   |
| Cyclophosphamide use only, n (%)                                | 44 (33); n=132     | 5 (8); n=59       | <0.001  |
| Rituximab and cyclophosphamide, n (%)                           | 34 (26); n=132     | 15 (25); n=59     | 0.961   |
| Mean (SD) cyclophosphamide cumulative dose in grams             | 3.6 (2.4); n=75    | 2.9 (3.3); n=20   | 0.2978  |
| PLEX, n (%)                                                     | 21 (16); n=132     | 5 (8); n=59       | 0.166   |
| Use of hydroxychloroquine                                       | 1 (1); n=130       | 0; n=58           | 0.503   |
| Use of PJP prophylaxis                                          | 119 (90); n=132    | 43 (73); n=59     | 0.002   |
| IVIG                                                            | 21 (16); n=132     | 5 (8); n=59       | 0.166   |
